# Supplementary material
Source: MDPI journal article supplement (https://www.mdpi.com/2304-6740/11/4/148)
Supplement: s1 [file s1]

# Metal Chelation Enables High Performance Tea Polyphenol Electrodes for Lithium-ion Batteries

**Yan Guo <sup>1,#</sup>, Junpo Guo <sup>1,#</sup>, Bo Li <sup>1,#</sup>, Yun Zheng <sup>1</sup>, Wen Lei <sup>1,2</sup>, Jiangmin Jiang <sup>1,3</sup>,  
Jincheng Xu <sup>1</sup>, Jingjun Shen <sup>1</sup>, Jielei Li <sup>1</sup>, Huaiyu Shao <sup>1,\*</sup>**

<sup>1</sup>*Guangdong-Hong Kong-Macau Joint Laboratory for Photonic-Thermal-Electrical  
Energy Materials and Devices, Institute of Applied Physics and Materials Engineering,  
University of Macau, Avenida da Universidade, Taipa, Macau SAR 999078, China*

<sup>2</sup>*The State Key Laboratory of Refractories and Metallurgy, Wuhan University of Science  
and Technology, Wuhan 430081, China*

<sup>3</sup>*School of Materials and Physics, China University of Mining and Technology, Xuzhou  
221116, China*

*\*Corresponding authors*

*#Equally contributing first author*

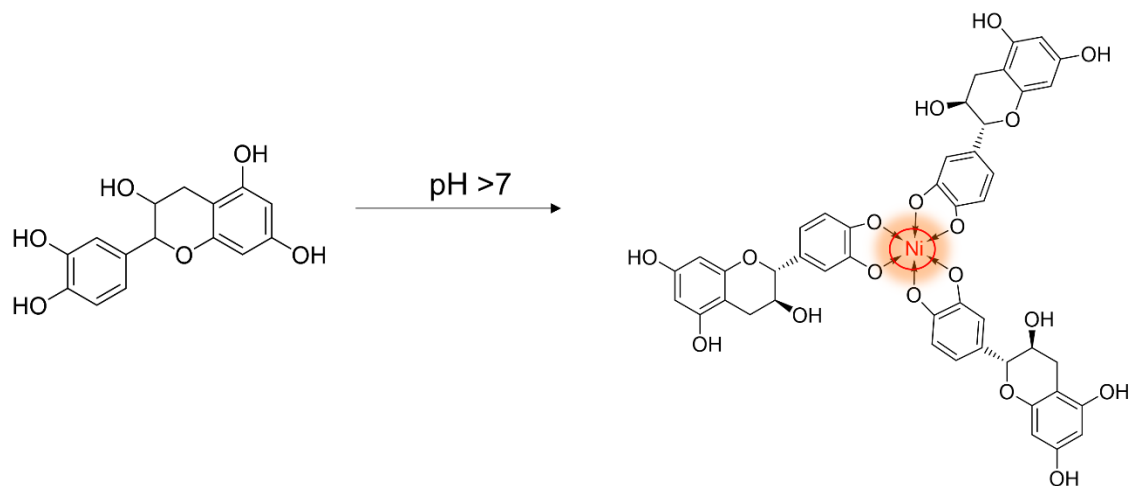

Figure S1. The synthesis of TP-Ni compound.

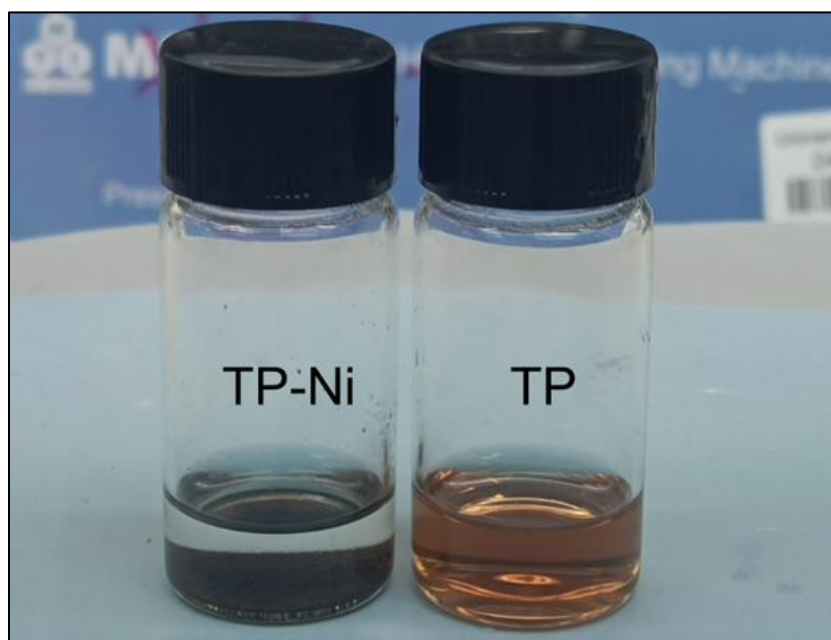

Figure S2. The solubility comparison of TP and TP-Ni.

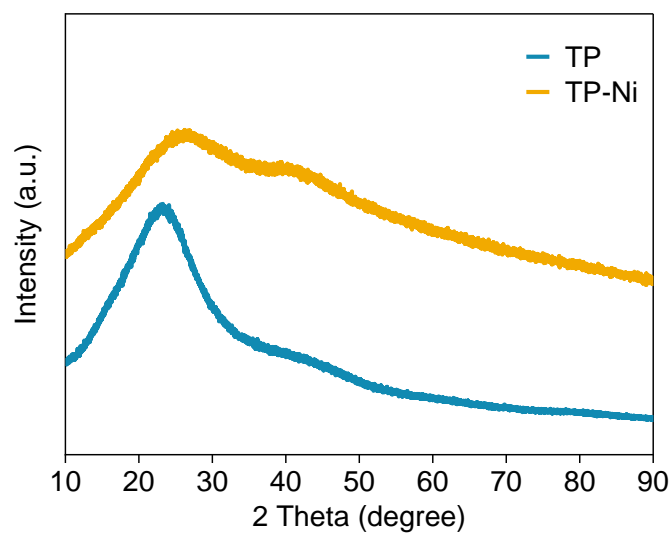

Figure S3. XRD profile of TP and TP-Ni.

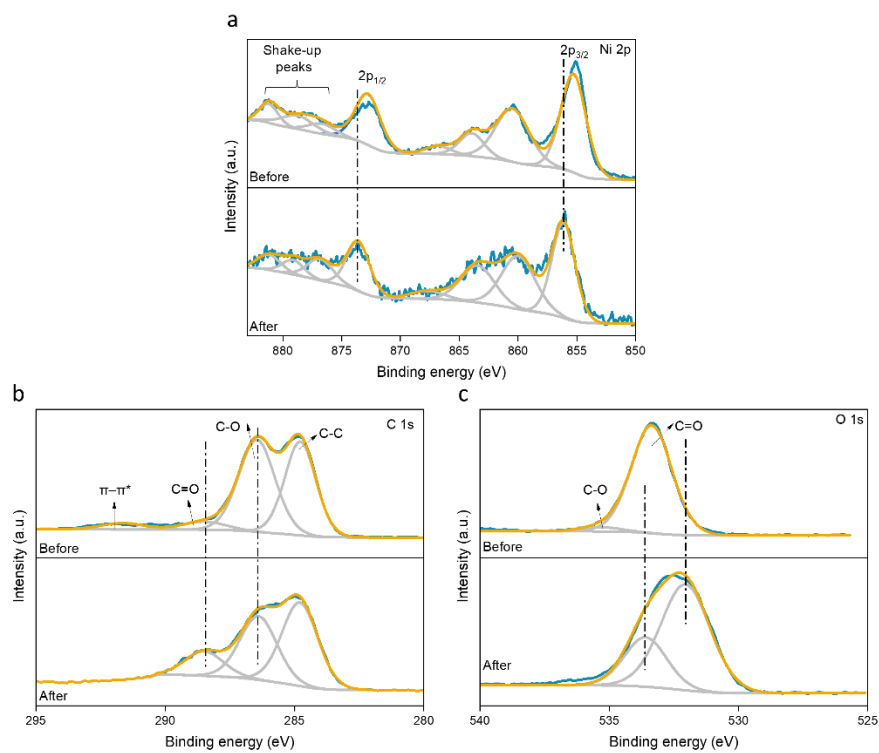

Figure S4. XPS spectra before and after coordination of (a) Ni 2p, (b) C 1s, (c) O 1s.

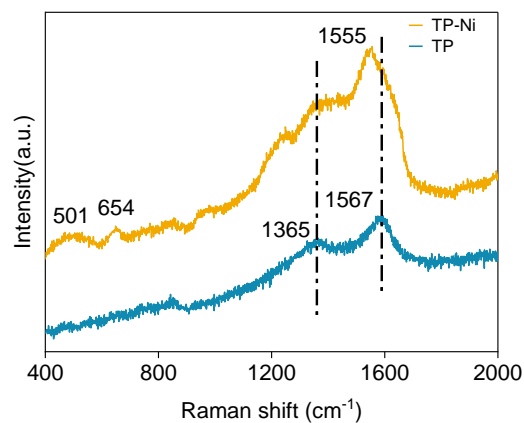

Figure S5. The Raman spectrum of TP and TP-Ni.

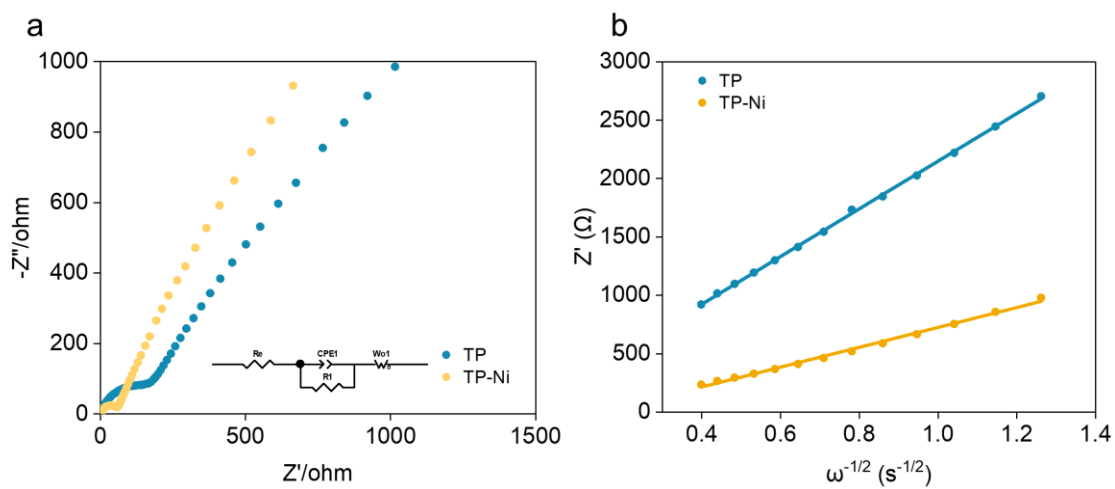

Figure S6 (a) Nyquist plot of EIS spectra, (b) relationship between real part of impedance versus  $\omega^{-0.5}$  in the TP and TP-Ni cells.

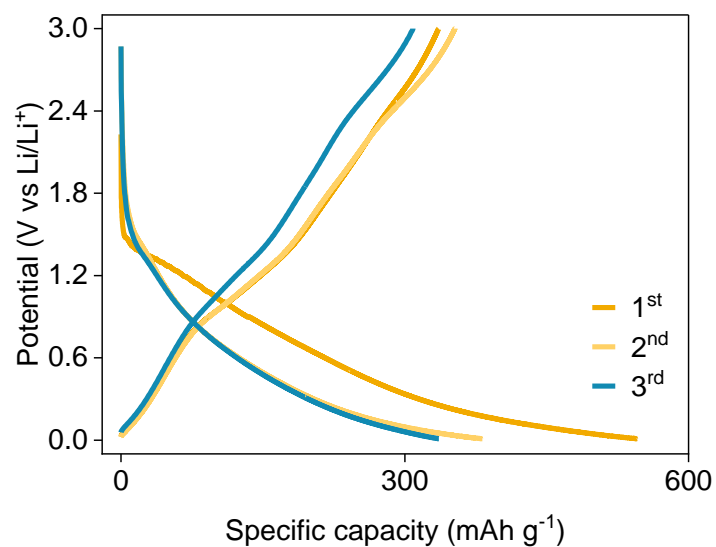

Figure S7. Galvanostatic charge and discharge curves of TP anode at a current density of  $0.1 \text{ A g}^{-1}$ .

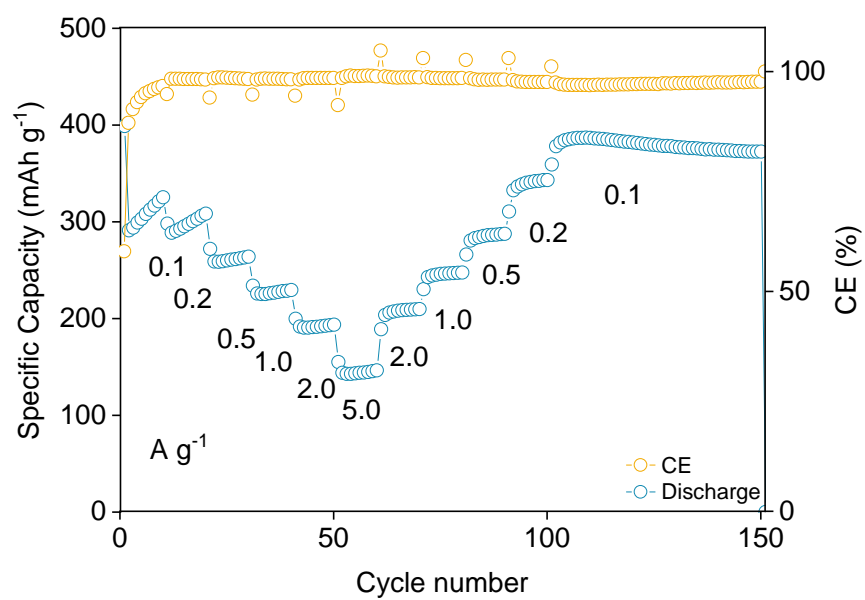

Figure S8. Rate performance of TP anode.

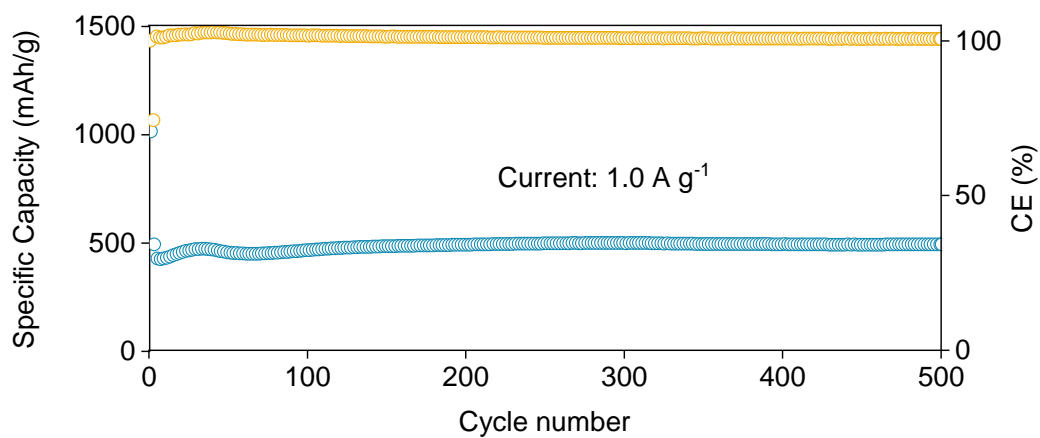

Figure S9. Long cycling performance measured at the current density of  $1.0 \text{ A g}^{-1}$ .

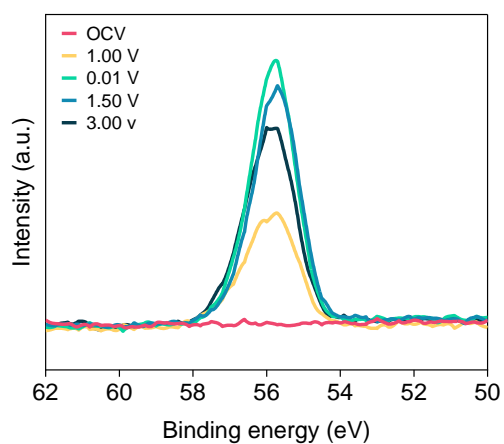

Figure S10. XPS spectra of Li 1s in the TP-Ni electrodes during the first discharge/charge cycle.

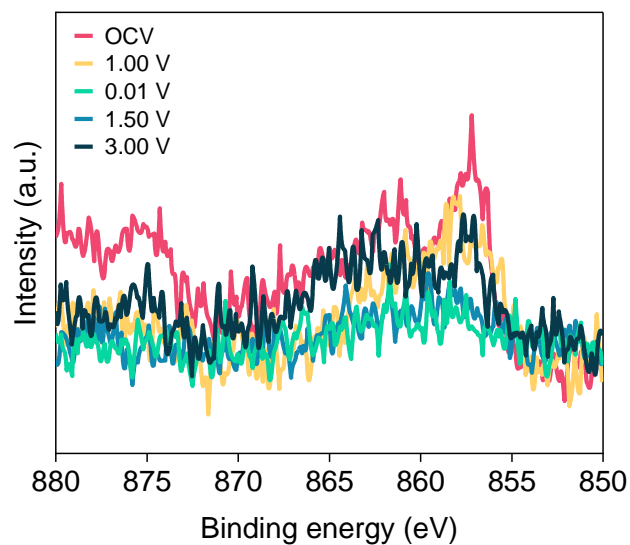

Figure S11. XPS spectra of Ni 2p in the TP-Ni electrodes during the first discharge/charge cycle

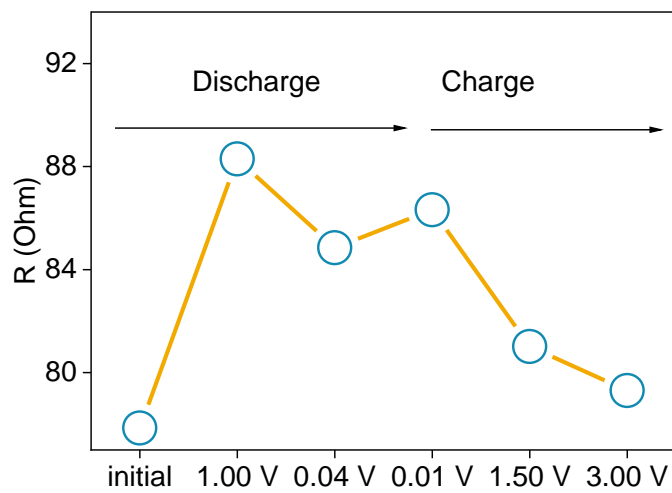

Figure S12. The summary of impedances at different discharge/charge states in the first cycle.

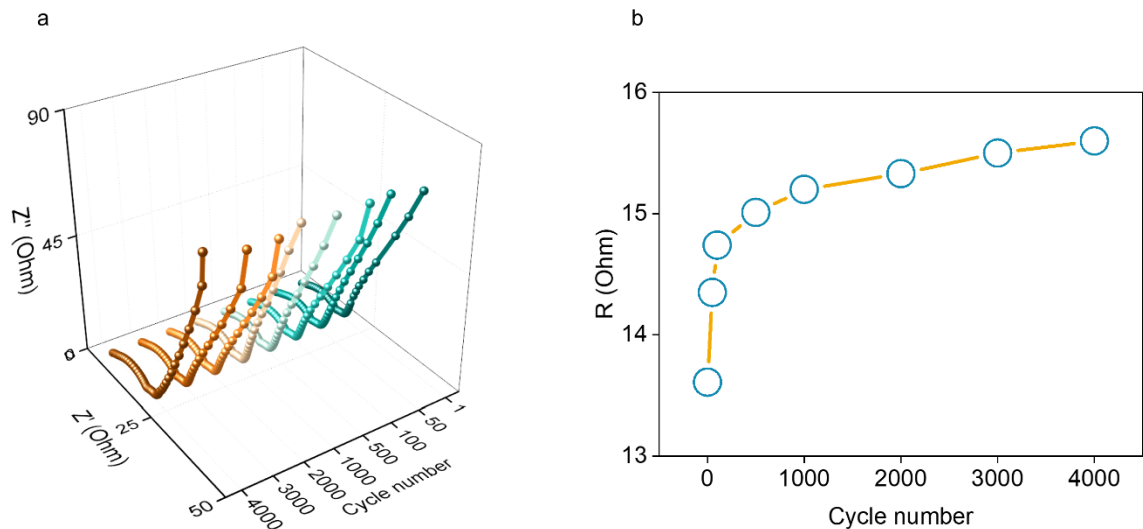

Figure S13. (a) Nyquist of TP-Ni anodes after different cycles. (b) The summary of impedances after different cycles.

Table S1. The content of different elements in the prepared TP-Ni material according to EDS.

| Sample | C (wt.%) | O (wt.%) | Ni (wt.%) |
|--------|----------|----------|-----------|
| TP-Ni  | 52.15    | 43.83    | 4.02      |

Table S2. The  $R_{ct}$  and  $D_{Li^+}$  of TP and TP-Ni electrodes from EIS.

| Sample | $R_{ct}$ ( $\Omega$ ) | $D_{Li^+}$ ( $\text{cm}^2 \text{s}^{-1}$ ) |
|--------|-----------------------|--------------------------------------------|
| TP     | 134.7                 | $2.19 \times 10^{-13}$                     |
| TP-Ni  | 49.7                  | $1.50 \times 10^{-11}$                     |
